# Supplementary material for: Antipsychotics result in more weight gain in antipsychotic naive patients than in patients after antipsychotic switch and weight gain is irrespective of psychiatric diagnosis: A meta-analysis
Source: PLoS One. 2021 Feb 17;16(2):e0244944. doi: 10.1371/journal.pone.0244944 (PMC7888647; doi:10.1371/journal.pone.0244944)
Supplement: S3 File — (XLSX) [file pone.0244944.s003.xlsx]

## Sheet: AP switch
AP-switch	95%CI low	95%CI high	ES
amisulpride (<6wk; N=4)	0.23	2.57	1.4
amisulpride (6-16wk; N=6)	0.11	1.45	0.78
amisulpride (16-38wk; N=4)	-1.68	1.28	-0.2
amisulpride (>38wk; N= )	-9.8	-5.86	-7.8
aripiprazole (<6wk; N= 14)	-0.27	0.95	0.34
aripiprazole (6-16wk; N= 14)	-1.21	0.82	-0.19
aripiprazole (16-38wk; N= 11)	-1.6	0.31	-0.65
aripiprazole (>38wk; N= 10)	-1.04	1.13	0.04
asenapine (<6wk; N=4)	0.54	1.38	0.96
asenapine (16-38wk; N=3)	-0.72	0.4	-0.16
asenapine (>38wk; N=4)	0.7	2.14	1.1
blonanserine (<6wk; N=1)	0.67	2.87	1.77
blonanserine (6-16wk; N=2)	0.2	4.45	2.33
brexpiprazole (<6wkn, N=4)	1.92	-0.42	0.75
brexpiprazole (>38wkn, N=2)	1.97	0.65	1.31
Cariprazine (6-16wkn. N=3)	0.57	1.11	0.84
Cariprazine (>38wkn. N=4)	1.04	2.11	1.57
chlorpomazine (<6wk; N=3)	0.01	2.74	1.38
chlorpomazine (6-16wk; N=1)	2.04	2.5	2.27
chlorpomazine (16-38wk; N=1)	2.04	7.76	4.9
chlorpomazine (>38wk; N=0)
clozapine (<6wk; N=6)	4.12	1.22	2.67
clozapine (6-16wk; N=13)	2.62	4.98	3.8
clozapine (16-38wk; N=9)	2.43	5.07	3.75
clozapine (>38wk; N=7)	7.59	14.21	10.91
FGA (<6wk; N=2)	0.91	1.84	1.38
FGA (6-16wk; N=5)	-0.06	1.04	0.49
FGA (16-38wk; N=3)	-1.56	5.35	1.9
FGA (>38wk; N=4)	-0.32	7.16	3.42
haloperidol (<6wk; N=12)	0.25	1.17	0.71
haloperidol (6-16wk; N=16)	-0.08	1.12	0.52
haloperidol (<6wk; N=5)	0.09	2.56	1.32
haloperidol (<6wk; N=10)	-1.06	2.03	0.48
iloperidone (<6wk;N=3)	0.33	3.16	1.75
iloperidone (6-16wk;N=1)	0.35	1.09	0.72
iloperidone (16-38wk;N=1)	0.3	1.44	0.87
lurasidone (<6wk; N=12)	0.2	0.72	0.46
lurasidone (16-38wk; N=3))	-0.9	1.24	0.17
no med/placebo (<6wk; N=27)	-0.27	0.21	0.03
no med/placebo (6-16wk; N=18)	0.08	0.33	0.21
no med/placebo (16-38wk; N=7)	-0.96	0.71	-0.12
no med/placebo (>38wk; N=5)	-2.02	0	-1.01
olanzapine (<6wk;N=43)	1.9	2.53	2.22
olanzapine (6-16wk;N=62)	2.45	3.31	2.88
olanzapine (16-38wk;N=32)	2.04	3.24	2.64
olanzapine (<6wk;N=28)	2.09	4.51	3.3
paliperidone (<6wk; N=17)	0.71	1.21	0.96
paliperidone (6-16wk; N=14)	0.81	1.51	1.16
paliperidone (16-38wk; N=13)	0.32	1.44	0.88
paliperidone (>38wk; N=9)	1.73	3.46	2.6
quetiapine (<6wk; N=9)	0.49	1.72	1.1
quetiapine (6-16wk; N=22)	0.95	1.9	1.43
quetiapine (16-38wk; N=11)	0.21	2.6	1.43
quetiapine (>38wk; N=3)	-0.38	3.74	1.68
risperidone (<6wkn; N=19)	1.17	1.97	1.57
risperidone (6-16wkn; N=37)	1.31	1.76	1.54
risperidone (16-38wkn; N=22)	1.13	2.37	1.75
risperidone (>38wkn; N=21)	1.19	2.56	1.89
ziprasidone (<6wk; N=4)	-3.33	2.04	-0.65
ziprasidone (6-16wk; N=11)	-1.33	0.83	-0.25
ziprasidone (16-38wk; N=6)	-2.55	-0.06	-1.24
ziprasidone (>38wk; N=4)	-6.55	0.05	-3.25
zotepine (<6wk; N=2)	0.2	1.77	0.99
zotepine (6-16wk; N=1)	1.33	4.23	2.78
sulpipirde (<6wk; N=2)	0.08	0.78	0.43
sulpipirde (<38wk; N=1)	0.98	2.74	1.86

## Sheet: AP naif
AP-naif	95%CI high	95%CI low	ES
amisulpride (<6wk; N=2; n=95)	5.52	1.35	3.43
amisulpride (>38wk; N=1; n=104)	10.03	9.37	9.7
aripiprazole (<6wk; N= 4; n=311)	0.82	-0.26	0.28
aripiprazole (6-16wk; N=11; n=878)	3.31	0.74	1.59
aripiprazole (16-38wk; N=2; n=129)	6.51	-1.73	2.39
aripiprazole (>38wk; N=4; n=349)	5.91	0.71	3.31
clozapine (<6wk; N=1; n=14)	8.31	4.73	6.52
clozapine (6-38wk;N=1; n=34)	4.45	0.15	2.3
clozapine (>38wk; N=2; n=207)	10.18	2.31	6.21
haloperidol (<6wk; N=3; n=173)	3.44	0.35	1.9
haloperidol (6-16wk; N=4; n=)	5.2	0.57	2.88
haloperidol (<6wk; N=1)	9.16	4.84	7
haloperidol (<6wk; N=6)	9.53	6.41	7.97
no med/placebo (<6wk; N=13; n=547)	0.28	-0.18	0.05
no med/placebo (6-16wk; N16; n=1135)	0.53	0.14	0.33
no med/placebo (16-38wk; N=3; n=218)	0.24	-2.05	-0.91
no med/placebo (>38wk; N=3; n=120)	2.18	-2.42	-0.12
olanzapine (<6wk; N=25; n=1160)	4.63	2.67	3.34
olanzapine (6-16wk; N=23; n=844)	6.05	4	5.03
olanzapine (16-38wk; N=7; n=316)	4.63	2.25	3.44
olanzapine (<6wk; N=10; n=574)	13.25	4.87	9.06
paliperidone (<6wk; N=1; n=28)	2.76	0.62	1.69
paliperidone (6-16wk; N=2; n=91)	5.88	-3.41	1.24
paliperidone(16-38wk; N=1;n=63)	0.27	-0.87	-0.3
paliperidone (>38; N=1; n=63)	0.89	-0.49	0.2
quetiapine (<6wk; N=4; n=68)	4.85	1.06	2.96
quetiapine (6-16wk; N=8; n=525)	4.18	0.34	2.26
quetiapine (16-38wk; N=2; 117)	8.72	-2.69	3.02
quetiapine (>38wk; N=4; n=317)	11.59	0.7	6.14
risperidone (<6wkn; N=7; n=338)	4.6	2.11	3.35
risperidone (6-16wkn; N=6; n=151)	6.29	1.87	4.08
risperidone (16-38wkn; N=5; n=194)	9.03	1.35	5.19
risperidone (>38wkn; N=5; n=446)	10.07	3.55	7.81
ziprasidone (<6wk; N=4; n=204)	1.46	-0.73	0.37
ziprasidone (6-16wk; N=5; n=258)	2.33	-1.69	0.32
ziprasidone (16-38wk; N=2; n=89)	7.16	-6.16	0.5
ziprasidone (>38wk; N=4; n=223)	8.23	-3.87	2.18
